# Supplementary material for: Analysis of urine Raman spectra differences from patients with diabetes mellitus and renal pathologies
Source: PeerJ. 2023 Feb 27;11:e14879. doi: 10.7717/peerj.14879 (PMC9979830; doi:10.7717/peerj.14879)
Supplement: Supplemental Information 1 [file peerj-11-14879-s001.xlsx]

## Sheet: Intro
Analysis of Urine Raman Spectra Differences from Patients with Diabetes Mellitus and Renal Pathologies
Authors: Varun Kavuru MDa,e, Ryan Senger PhDb, John Robertson VMD, PhDc,d, Devasmita Choudhury MDa,d
Affiliations:
a Virginia Tech Carilion School of Medicine
b Virginia Tech Biological Systems Engineering
c Virginia Tech Biomedical Engineering and Mechanics
d Salem Veteran Affairs Health Care System
e University Hospital at University of Virginia Medical Center
Corresponding Author: Varun Kavuru
Address: 760 Walker Square Apt. 4A, Charlottesville 22903
Phone: 540-632-8641
Email: vsk4jb@virginia.edu

## Sheet: Analysis 1
Identifying differences between DKD and IMN
Table S1. DKD vs. IMN Loadings and Raman Band Assignments
Band Assignments from (Movasaghi et al., 2007; Talari et al., 2014)
Raman Shift	PC or DAPC Loadings?	Band Assignment
771	Both	None
776	Both	Phosphatidylinositol
826	Both	DNA
831	PC	DNA, Tyrosine
860	DAPC	Phosphate, Phosphatidic acid
867	PC	RNA
890	Both	Protein, Structural protein bands of tumors, Beta-anomers
898	Both	Glucose (monosaccharides), Maltose (disaccharides), Adenine
904	DAPC	C-C stretching
910	DAPC	None
931	Both	Carbohydrates
1002	Both	Urea
1004	Both	Phenylalanine, Collagen assignment
1007	Both	Phenylalanine, Carbamide
1016	DAPC	Carbohydrates
1022	PC	Glycogen
1046	DAPC	None
1048	PC	Glycogen
1055	Both	Nucleic acids
1060	Both	Lipids, Carbohydrates							Figure S1. PC Loadings
1074	DAPC	Glucose
1078	Both	Nucleic acids
1105	Both	Carbohydrates
1111	Both	Benzoid ring
1114	Both	None
1165	PC	None
1169	PC	Tyrosine, Collagen
1237	Both	Amide III
1242	Both	Amide III, Beta sheet and random coils
1265	PC	Lipids
1269	PC	Amide III, Collagen assignment
1303	PC	Collagen assignment
1309	PC	Lipids and collagen
1314	PC	Collagen
1318	Both	DNA, Protein, Amide III alpha-helix
1320	DAPC	Nucleic acids, Protein
1328	PC	None
1340	PC	Nucleic acids, Collagen
1355	DAPC	Guanine
1360	DAPC	Tryptophan
1610	PC	Cytosine
									Figure S2. DAPC Loadings

## Sheet: Analysis 2
Distinguishing Among All Glomerular Diseases Simultaneously
Table S2. Prediction metrics for all disease classes
Sample Class	Accuracy	Sensitivity	Specificity	PPV	NPV
DKD	0.65625	0.4	0.772727	0.444444	0.73913
IMN	0.65625	0.5	0.727273	0.454545	0.761905
MN	0.90625	0.4	1	1	0.9
Other	0.84375	0.5	0.892857	0.4	0.925926
RN	0.875	0.666667	0.896552	0.4	0.962963
Table S3. Class predictions for the entire dataset
Sample	Actual Class	Prediction	Correct?
1	DKD'	'Other'	No
2	DKD'	DKD'	Yes
3	MN'	MN'	Yes
4	'Other'	'IMN'	No
5	DKD'	'RN'	No
6	'IMN'	'IMN'	Yes
7	MN'	DKD'	No
8	DKD'	DKD'	Yes
9	MN'	'IMN'	No
10	'IMN'	DKD'	No
11	'Other'	'Other'	Yes
12	DKD'	'RN'	No
13	MN'	'IMN'	No
14	'IMN'	'IMN'	Yes
15	'Other'	'Other'	Yes
16	'IMN'	'IMN'	Yes
17	MN'	MN'	Yes
18	'IMN'	DKD'	No
19	'RN'	'RN'	Yes
20	DKD'	DKD'	Yes
21	'IMN'	'IMN'	Yes
22	'IMN'	'Other'	No
23	'IMN'	'Other'	No
24	'RN'	'IMN'	No
25	'IMN'	'IMN'	Yes
26	DKD'	'IMN'	No
27	DKD'	DKD'	Yes
28	'IMN'	DKD'	No
29	DKD'	'IMN'	No
30	DKD'	'RN'	No
31	'Other'	DKD'	No
32	'RN'	'RN'	Yes
		# Yes	15
		# No	17
		% Correct	0.46875

## Sheet: Analysis 3
Finding One Disease Class Among All Glomerular Diseases							Yes = Positive
							No = Negative
DKD				IMN				MN				RN
Sample	Actual Class	Prediction		Sample	Actual Class	Prediction		Sample	Actual Class	Prediction		Sample	Actual Class	Prediction
1	'Yes'	'No'		1	'No'	'No'		1	'No'	'No'		1	'No'	'No'
2	'Yes'	'No'		2	'No'	'No'		2	'No'	'No'		2	'No'	'No'
3	'No'	'No'		3	'No'	'No'		3	'Yes'	'Yes'		3	'No'	'No'
4	'No'	'Yes'		4	'No'	'Yes'		4	'No'	'No'		4	'No'	'No'
5	'Yes'	'Yes'		5	'No'	'No'		5	'No'	'No'		5	'No'	'No'
6	'No'	'No'		6	'Yes'	'Yes'		6	'No'	'No'		6	'No'	'No'
7	'No'	'No'		7	'No'	'No'		7	'Yes'	'No'		7	'No'	'No'
8	'Yes'	'Yes'		8	'No'	'No'		8	'No'	'No'		8	'No'	'No'
9	'Yes'	'Yes'		9	'Yes'	'Yes'		9	'No'	'No'		9	'No'	'No'
10	'No'	'No'		10	'No'	'Yes'		10	'Yes'	'No'		10	'No'	'No'
11	'No'	'Yes'		11	'Yes'	'Yes'		11	'No'	'No'		11	'No'	'No'
12	'No'	'No'		12	'No'	'Yes'		12	'No'	'No'		12	'No'	'No'
13	'Yes'	'Yes'		13	'No'	'No'		13	'No'	'No'		13	'No'	'No'
14	'No'	'No'		14	'No'	'Yes'		14	'Yes'	'Yes'		14	'No'	'No'
15	'No'	'No'		15	'Yes'	'Yes'		15	'Yes'	'Yes'		15	'No'	'No'
16	'No'	'Yes'		16	'Yes'	'Yes'		16	'No'	'No'		16	'No'	'No'
17	'No'	'Yes'		17	'No'	'No'		17	'No'	'No'		17	'No'	'No'
18	'No'	'No'		18	'Yes'	'No'		18	'No'	'No'		18	'No'	'No'
19	'No'	'No'		19	'No'	'No'		19	'Yes'	'Yes'		19	'No'	'No'
20	'No'	'No'		20	'Yes'	'Yes'		20	'No'	'No'		20	'No'	'No'
21	'Yes'	'Yes'		21	'No'	'No'		21	'No'	'Yes'		21	'Yes'	'Yes'
22	'Yes'	'Yes'		22	'No'	'No'		22	'No'	'No'		22	'No'	'No'
23	'No'	'No'		23	'Yes'	'Yes'		23	'No'	'No'		23	'No'	'No'
24	'No'	'No'		24	'Yes'	'Yes'		24	'No'	'No'		24	'No'	'No'
25	'No'	'No'		25	'Yes'	'Yes'		25	'No'	'No'		25	'No'	'No'
26	'No'	'No'		26	'No'	'No'		26	'No'	'No'		26	'Yes'	'Yes'
27	'No'	'No'		27	'Yes'	'Yes'		27	'No'	'No'		27	'No'	'No'
28	'Yes'	'Yes'		28	'No'	'No'		28	'No'	'No'		28	'No'	'No'
29	'Yes'	'Yes'		29	'No'	'No'		29	'No'	'No'		29	'No'	'No'
30	'No'	'No'		30	'Yes'	'No'		30	'No'	'No'		30	'No'	'No'
31	'Yes'	'Yes'		31	'No'	'No'		31	'No'	'No'		31	'No'	'No'
32	'Yes'	'No'		32	'No'	'No'		32	'No'	'No'		32	'No'	'No'
33	'No'	'No'		33	'No'	'No'		33	'No'	'No'		33	'No'	'No'
34	'No'	'Yes'		34	'No'	'No'		34	'No'	'No'		34	'Yes'	'Yes'

## Sheet: Analysis 4
Detecting DKD Among a Larger Population					DKD = Positive
					Non-DKD = Negative
DKD
Sample	Actual Class	Prediction
1	Non-DKD	Non-DKD
2	Non-DKD	Non-DKD
3	Non-DKD	Non-DKD
4	Non-DKD	Non-DKD
5	Non-DKD	Non-DKD
6	Non-DKD	Non-DKD
7	Non-DKD	Non-DKD
8	Non-DKD	Non-DKD
9	Non-DKD	Non-DKD
10	Non-DKD	Non-DKD
11	Non-DKD	Non-DKD
12	Non-DKD	Non-DKD
13	Non-DKD	Non-DKD
14	Non-DKD	Non-DKD
15	Non-DKD	Non-DKD
16	Non-DKD	Non-DKD
17	Non-DKD	Non-DKD
18	Non-DKD	Non-DKD
19	Non-DKD	Non-DKD
20	Non-DKD	Non-DKD
21	Non-DKD	Non-DKD
22	Non-DKD	Non-DKD
23	Non-DKD	Non-DKD
24	Non-DKD	Non-DKD
25	Non-DKD	Non-DKD
26	Non-DKD	Non-DKD
27	Non-DKD	Non-DKD
28	Non-DKD	Non-DKD
29	Non-DKD	Non-DKD
30	Non-DKD	Non-DKD
31	Non-DKD	Non-DKD
32	Non-DKD	Non-DKD
33	Non-DKD	Non-DKD
34	Non-DKD	Non-DKD
35	Non-DKD	Non-DKD
36	Non-DKD	Non-DKD
37	Non-DKD	Non-DKD
38	Non-DKD	Non-DKD
39	Non-DKD	Non-DKD
40	Non-DKD	Non-DKD
41	Non-DKD	Non-DKD
42	Non-DKD	Non-DKD
43	Non-DKD	Non-DKD
44	Non-DKD	Non-DKD
45	Non-DKD	Non-DKD
46	Non-DKD	Non-DKD
47	Non-DKD	Non-DKD
48	Non-DKD	Non-DKD
49	Non-DKD	Non-DKD
50	Non-DKD	Non-DKD
51	Non-DKD	Non-DKD
52	Non-DKD	Non-DKD
53	Non-DKD	Non-DKD
54	Non-DKD	Non-DKD
55	Non-DKD	DKD'
56	Non-DKD	DKD-Neg'
57	Non-DKD	DKD-Neg'
58	Non-DKD	DKD-Neg'
59	Non-DKD	DKD-Neg'
60	Non-DKD	DKD-Neg'
61	Non-DKD	DKD-Neg'
62	Non-DKD	DKD-Neg'
63	Non-DKD	DKD-Neg'
64	Non-DKD	DKD-Neg'
65	Non-DKD	DKD-Neg'
66	Non-DKD	DKD-Neg'
67	Non-DKD	DKD-Neg'
68	Non-DKD	DKD-Neg'
69	Non-DKD	DKD-Neg'
70	Non-DKD	DKD-Neg'
71	Non-DKD	DKD-Neg'
72	Non-DKD	DKD-Neg'
73	Non-DKD	DKD-Neg'
74	Non-DKD	DKD-Neg'
75	Non-DKD	DKD-Neg'
76	Non-DKD	DKD-Neg'
77	Non-DKD	DKD-Neg'
78	Non-DKD	DKD-Neg'
79	Non-DKD	DKD-Neg'
80	Non-DKD	DKD'
81	Non-DKD	Non-DKD
82	Non-DKD	Non-DKD
83	Non-DKD	Non-DKD
84	Non-DKD	Non-DKD
85	Non-DKD	Non-DKD
86	Non-DKD	Non-DKD
87	Non-DKD	Non-DKD
88	Non-DKD	Non-DKD
89	Non-DKD	Non-DKD
90	Non-DKD	Non-DKD
91	Non-DKD	Non-DKD
92	Non-DKD	Non-DKD
93	Non-DKD	DKD'
94	Non-DKD	Non-DKD
95	Non-DKD	Non-DKD
96	Non-DKD	Non-DKD
97	Non-DKD	Non-DKD
98	Non-DKD	Non-DKD
99	Non-DKD	Non-DKD
100	Non-DKD	Non-DKD
101	Non-DKD	Non-DKD
102	Non-DKD	Non-DKD
103	Non-DKD	Non-DKD
104	Non-DKD	Non-DKD
105	Non-DKD	Non-DKD
106	Non-DKD	Non-DKD
107	Non-DKD	Non-DKD
108	Non-DKD	Non-DKD
109	Non-DKD	Non-DKD
110	Non-DKD	Non-DKD
111	Non-DKD	Non-DKD
112	Non-DKD	Non-DKD
113	Non-DKD	Non-DKD
114	Non-DKD	Non-DKD
115	Non-DKD	Non-DKD
116	Non-DKD	Non-DKD
117	Non-DKD	Non-DKD
118	Non-DKD	Non-DKD
119	Non-DKD	Non-DKD
120	Non-DKD	Non-DKD
121	Non-DKD	Non-DKD
122	Non-DKD	Non-DKD
123	Non-DKD	Non-DKD
124	Non-DKD	Non-DKD
125	Non-DKD	Non-DKD
126	Non-DKD	Non-DKD
127	Non-DKD	Non-DKD
128	Non-DKD	Non-DKD
129	Non-DKD	Non-DKD
130	Non-DKD	Non-DKD
131	Non-DKD	Non-DKD
132	Non-DKD	Non-DKD
133	Non-DKD	Non-DKD
134	Non-DKD	Non-DKD
135	Non-DKD	Non-DKD
136	Non-DKD	Non-DKD
137	Non-DKD	Non-DKD
138	Non-DKD	Non-DKD
139	Non-DKD	Non-DKD
140	DKD'	Non-DKD
141	DKD'	Non-DKD
142	DKD'	DKD'
143	DKD'	Non-DKD
144	DKD'	DKD'
145	DKD'	Non-DKD
146	DKD'	DKD'
147	DKD'	DKD'
148	DKD'	Non-DKD
149	DKD'	Non-DKD
150	DKD'	Non-DKD

## Sheet: Analysis 5
How many un-biopsied patients with DM would screen positive for DKD?
Un-Biopsied Diabetic Patients
Sample	Prediction
1	'DKD'
2	'DKD-Neg'
3	'DKD-Neg'
4	'DKD-Neg'
5	'DKD-Neg'
6	'DKD-Neg'
7	'DKD-Neg'
8	'DKD-Neg'
9	'DKD-Neg'
10	'DKD-Neg'
11	'DKD-Neg'
12	'DKD-Neg'
13	'DKD-Neg'
14	'DKD-Neg'
15	'DKD-Neg'
16	'DKD-Neg'
17	'DKD-Neg'
18	'DKD-Neg'
19	'DKD-Neg'
20	'DKD-Neg'
21	'DKD-Neg'
22	'DKD-Neg'
23	'DKD-Neg'
24	'DKD-Neg'
25	'DKD-Neg'
26	'DKD-Neg'
27	'DKD-Neg'
28	'DKD-Neg'
29	'DKD-Neg'
30	'DKD'
31	'DKD-Neg'
32	'DKD-Neg'
33	'DKD-Neg'
34	'DKD-Neg'
35	'DKD-Neg'
36	'DKD-Neg'
37	'DKD'
38	'DKD-Neg'
39	'DKD'
40	'DKD-Neg'
41	'DKD-Neg'
42	'DKD-Neg'
43	'DKD-Neg'
44	'DKD-Neg'
45	'DKD-Neg'
46	'DKD-Neg'
47	'DKD-Neg'
48	'DKD-Neg'
49	'DKD-Neg'
50	'DKD-Neg'
51	'DKD-Neg'
52	'DKD-Neg'
53	'DKD-Neg'
54	'DKD'
55	'DKD-Neg'
56	'DKD-Neg'
57	'DKD'
58	'DKD'
59	'DKD-Neg'
60	'DKD-Neg'
61	'DKD'
62	'DKD-Neg'
63	'DKD-Neg'
64	'DKD-Neg'
65	'DKD-Neg'
66	'DKD-Neg'
67	'DKD-Neg'
68	'DKD-Neg'
69	'DKD-Neg'
70	'DKD-Neg'
71	'DKD-Neg'
72	'DKD-Neg'
73	'DKD'
74	'DKD-Neg'
75	'DKD-Neg'
76	'DKD-Neg'
77	'DKD-Neg'
78	'DKD-Neg'
79	'DKD-Neg'
80	'DKD'
81	'DKD-Neg'
82	'DKD'
83	'DKD-Neg'
84	'DKD-Neg'
85	'DKD-Neg'
86	'DKD-Neg'
87	'DKD-Neg'
88	'DKD-Neg'
89	'DKD'
90	'DKD-Neg'
91	'DKD-Neg'
92	'DKD-Neg'
93	'DKD-Neg'
94	'DKD'
95	'DKD-Neg'
96	'DKD-Neg'
97	'DKD-Neg'
98	'DKD-Neg'
99	'DKD-Neg'
100	'DKD-Neg'
101	'DKD-Neg'
102	'DKD-Neg'
103	'DKD-Neg'
104	'DKD-Neg'
105	'DKD-Neg'
106	'DKD-Neg'
107	'DKD-Neg'
108	'DKD-Neg'
109	'DKD-Neg'
110	'DKD-Neg'
111	'DKD-Neg'
112	'DKD-Neg'
113	'DKD-Neg'
114	'DKD-Neg'
115	'DKD-Neg'
116	'DKD-Neg'
117	'DKD-Neg'
118	'DKD-Neg'
119	'DKD-Neg'
120	'DKD-Neg'
121	'DKD-Neg'
122	'DKD-Neg'
123	'DKD-Neg'
124	'DKD-Neg'
125	'DKD-Neg'
126	'DKD-Neg'
127	'DKD-Neg'
128	'DKD-Neg'
129	'DKD-Neg'
130	'DKD-Neg'
131	'DKD-Neg'
132	'DKD-Neg'
133	'DKD-Neg'
134	'DKD-Neg'
135	'DKD-Neg'
136	'DKD-Neg'
137	'DKD-Neg'
138	'DKD-Neg'
139	'DKD-Neg'
140	'DKD-Neg'
141	'DKD-Neg'
142	'DKD-Neg'
143	'DKD-Neg'
144	'DKD-Neg'
145	'DKD-Neg'
146	'DKD-Neg'
147	'DKD-Neg'
148	'DKD-Neg'
149	'DKD-Neg'
150	'DKD-Neg'
151	'DKD-Neg'
152	'DKD-Neg'
153	'DKD-Neg'
154	'DKD-Neg'
155	'DKD-Neg'
156	'DKD-Neg'

## Sheet: Analysis 6
Detecting IMN Among Larger Populations					IMN/DM- = Positive	IMN/DM+ = Positive
					Non-IMN/DM- = Negative	Non-IMN/DM+ = Negative
IMN/DM-				IMN/DM+
Sample	Actual Class	Prediction		Sample	Actual Class	Prediction
1	Non-IMN/DM-	Non-IMN/DM-		1	Non-IMN/DM+	Non-IMN/DM+
2	Non-IMN/DM-	Non-IMN/DM-		2	Non-IMN/DM+	Non-IMN/DM+
3	Non-IMN/DM-	Non-IMN/DM-		3	Non-IMN/DM+	Non-IMN/DM+
4	Non-IMN/DM-	Non-IMN/DM-		4	Non-IMN/DM+	Non-IMN/DM+
5	Non-IMN/DM-	Non-IMN/DM-		5	Non-IMN/DM+	Non-IMN/DM+
6	Non-IMN/DM-	Non-IMN/DM-		6	Non-IMN/DM+	Non-IMN/DM+
7	IMN/DM-	IMN/DM-		7	Non-IMN/DM+	Non-IMN/DM+
8	IMN/DM-	Non-IMN/DM-		8	Non-IMN/DM+	Non-IMN/DM+
9	IMN/DM-	IMN/DM-		9	Non-IMN/DM+	Non-IMN/DM+
10	IMN/DM-	IMN/DM-		10	Non-IMN/DM+	Non-IMN/DM+
11	IMN/DM-	Non-IMN/DM-		11	Non-IMN/DM+	Non-IMN/DM+
12	IMN/DM-	Non-IMN/DM-		12	IMN/DM+	IMN/DM+
13	Non-IMN/DM-	Non-IMN/DM-		13	IMN/DM+	IMN/DM+
14	Non-IMN/DM-	Non-IMN/DM-		14	IMN/DM+	Non-IMN/DM+
15	Non-IMN/DM-	Non-IMN/DM-		15	IMN/DM+	IMN/DM+
16	Non-IMN/DM-	Non-IMN/DM-		16	IMN/DM+	IMN/DM+
17	Non-IMN/DM-	Non-IMN/DM-		17	IMN/DM+	IMN/DM+
18	Non-IMN/DM-	Non-IMN/DM-		18	Non-IMN/DM+	Non-IMN/DM+
19	Non-IMN/DM-	Non-IMN/DM-		19	Non-IMN/DM+	Non-IMN/DM+
20	Non-IMN/DM-	Non-IMN/DM-		20	Non-IMN/DM+	Non-IMN/DM+
21	Non-IMN/DM-	Non-IMN/DM-		21	Non-IMN/DM+	Non-IMN/DM+
22	Non-IMN/DM-	Non-IMN/DM-		22	Non-IMN/DM+	Non-IMN/DM+
23	Non-IMN/DM-	Non-IMN/DM-		23	Non-IMN/DM+	Non-IMN/DM+
24	Non-IMN/DM-	Non-IMN/DM-		24	Non-IMN/DM+	Non-IMN/DM+
25	Non-IMN/DM-	Non-IMN/DM-		25	Non-IMN/DM+	Non-IMN/DM+
26	Non-IMN/DM-	Non-IMN/DM-		26	Non-IMN/DM+	Non-IMN/DM+
27	Non-IMN/DM-	Non-IMN/DM-		27	Non-IMN/DM+	Non-IMN/DM+
28	Non-IMN/DM-	Non-IMN/DM-		28	Non-IMN/DM+	Non-IMN/DM+
29	Non-IMN/DM-	Non-IMN/DM-		29	Non-IMN/DM+	Non-IMN/DM+
30	Non-IMN/DM-	Non-IMN/DM-		30	Non-IMN/DM+	Non-IMN/DM+
31	Non-IMN/DM-	Non-IMN/DM-		31	Non-IMN/DM+	Non-IMN/DM+
32	Non-IMN/DM-	Non-IMN/DM-		32	Non-IMN/DM+	Non-IMN/DM+
33	Non-IMN/DM-	Non-IMN/DM-		33	Non-IMN/DM+	Non-IMN/DM+
34	Non-IMN/DM-	Non-IMN/DM-		34	Non-IMN/DM+	Non-IMN/DM+
35	Non-IMN/DM-	Non-IMN/DM-		35	Non-IMN/DM+	Non-IMN/DM+
36	Non-IMN/DM-	Non-IMN/DM-		36	Non-IMN/DM+	Non-IMN/DM+
37	Non-IMN/DM-	Non-IMN/DM-		37	Non-IMN/DM+	Non-IMN/DM+
38	Non-IMN/DM-	Non-IMN/DM-		38	Non-IMN/DM+	Non-IMN/DM+
39	Non-IMN/DM-	Non-IMN/DM-		39	Non-IMN/DM+	Non-IMN/DM+
40	Non-IMN/DM-	Non-IMN/DM-		40	Non-IMN/DM+	Non-IMN/DM+
41	Non-IMN/DM-	Non-IMN/DM-		41	Non-IMN/DM+	Non-IMN/DM+
42	Non-IMN/DM-	Non-IMN/DM-		42	Non-IMN/DM+	Non-IMN/DM+
43	Non-IMN/DM-	Non-IMN/DM-		43	Non-IMN/DM+	Non-IMN/DM+
44	Non-IMN/DM-	Non-IMN/DM-		44	Non-IMN/DM+	Non-IMN/DM+
45	Non-IMN/DM-	Non-IMN/DM-		45	Non-IMN/DM+	Non-IMN/DM+
46	Non-IMN/DM-	Non-IMN/DM-		46	Non-IMN/DM+	Non-IMN/DM+
47	Non-IMN/DM-	Non-IMN/DM-		47	Non-IMN/DM+	Non-IMN/DM+
48	Non-IMN/DM-	Non-IMN/DM-		48	Non-IMN/DM+	Non-IMN/DM+
49	Non-IMN/DM-	Non-IMN/DM-		49	Non-IMN/DM+	Non-IMN/DM+
50	Non-IMN/DM-	Non-IMN/DM-		50	Non-IMN/DM+	Non-IMN/DM+
51	Non-IMN/DM-	Non-IMN/DM-		51	Non-IMN/DM+	Non-IMN/DM+
52	Non-IMN/DM-	Non-IMN/DM-		52	Non-IMN/DM+	Non-IMN/DM+
53	Non-IMN/DM-	Non-IMN/DM-		53	Non-IMN/DM+	Non-IMN/DM+
54	Non-IMN/DM-	Non-IMN/DM-		54	Non-IMN/DM+	Non-IMN/DM+
55	Non-IMN/DM-	Non-IMN/DM-		55	Non-IMN/DM+	Non-IMN/DM+
56	Non-IMN/DM-	Non-IMN/DM-		56	Non-IMN/DM+	Non-IMN/DM+
57	Non-IMN/DM-	Non-IMN/DM-		57	Non-IMN/DM+	Non-IMN/DM+
58	Non-IMN/DM-	Non-IMN/DM-		58	Non-IMN/DM+	Non-IMN/DM+
59	Non-IMN/DM-	Non-IMN/DM-		59	Non-IMN/DM+	Non-IMN/DM+
60	Non-IMN/DM-	Non-IMN/DM-		60	Non-IMN/DM+	Non-IMN/DM+
61	Non-IMN/DM-	Non-IMN/DM-		61	Non-IMN/DM+	Non-IMN/DM+
62	Non-IMN/DM-	Non-IMN/DM-		62	Non-IMN/DM+	Non-IMN/DM+
63	Non-IMN/DM-	Non-IMN/DM-		63	Non-IMN/DM+	Non-IMN/DM+
64	Non-IMN/DM-	Non-IMN/DM-		64	Non-IMN/DM+	Non-IMN/DM+
65	Non-IMN/DM-	Non-IMN/DM-		65	Non-IMN/DM+	Non-IMN/DM+
66	Non-IMN/DM-	Non-IMN/DM-		66	Non-IMN/DM+	Non-IMN/DM+
67	Non-IMN/DM-	Non-IMN/DM-		67	Non-IMN/DM+	Non-IMN/DM+
68	Non-IMN/DM-	Non-IMN/DM-		68	Non-IMN/DM+	Non-IMN/DM+
69	Non-IMN/DM-	Non-IMN/DM-		69	Non-IMN/DM+	Non-IMN/DM+
70	Non-IMN/DM-	Non-IMN/DM-		70	Non-IMN/DM+	Non-IMN/DM+
71	Non-IMN/DM-	Non-IMN/DM-		71	Non-IMN/DM+	Non-IMN/DM+
72	Non-IMN/DM-	Non-IMN/DM-		72	Non-IMN/DM+	Non-IMN/DM+
73	Non-IMN/DM-	Non-IMN/DM-		73	Non-IMN/DM+	Non-IMN/DM+
74	Non-IMN/DM-	Non-IMN/DM-		74	Non-IMN/DM+	Non-IMN/DM+
75	Non-IMN/DM-	Non-IMN/DM-		75	Non-IMN/DM+	Non-IMN/DM+
76	Non-IMN/DM-	Non-IMN/DM-		76	Non-IMN/DM+	Non-IMN/DM+
77	Non-IMN/DM-	Non-IMN/DM-		77	Non-IMN/DM+	Non-IMN/DM+
78	Non-IMN/DM-	Non-IMN/DM-		78	Non-IMN/DM+	Non-IMN/DM+
79	Non-IMN/DM-	Non-IMN/DM-		79	Non-IMN/DM+	Non-IMN/DM+
80	Non-IMN/DM-	Non-IMN/DM-		80	Non-IMN/DM+	Non-IMN/DM+
81	Non-IMN/DM-	Non-IMN/DM-		81	Non-IMN/DM+	Non-IMN/DM+
82	Non-IMN/DM-	Non-IMN/DM-		82	Non-IMN/DM+	Non-IMN/DM+
83	Non-IMN/DM-	Non-IMN/DM-		83	Non-IMN/DM+	Non-IMN/DM+
84	Non-IMN/DM-	Non-IMN/DM-		84	Non-IMN/DM+	Non-IMN/DM+
85	Non-IMN/DM-	Non-IMN/DM-		85	Non-IMN/DM+	Non-IMN/DM+
86	Non-IMN/DM-	Non-IMN/DM-		86	Non-IMN/DM+	Non-IMN/DM+
87	Non-IMN/DM-	Non-IMN/DM-		87	Non-IMN/DM+	Non-IMN/DM+
88	Non-IMN/DM-	Non-IMN/DM-		88	Non-IMN/DM+	Non-IMN/DM+
89	Non-IMN/DM-	Non-IMN/DM-		89	Non-IMN/DM+	Non-IMN/DM+
90	Non-IMN/DM-	Non-IMN/DM-		90	Non-IMN/DM+	Non-IMN/DM+
91	Non-IMN/DM-	Non-IMN/DM-		91	Non-IMN/DM+	Non-IMN/DM+
92	Non-IMN/DM-	Non-IMN/DM-		92	Non-IMN/DM+	Non-IMN/DM+
93	Non-IMN/DM-	Non-IMN/DM-		93	Non-IMN/DM+	Non-IMN/DM+
94	Non-IMN/DM-	Non-IMN/DM-		94	Non-IMN/DM+	Non-IMN/DM+
95	Non-IMN/DM-	Non-IMN/DM-		95	Non-IMN/DM+	Non-IMN/DM+
96	Non-IMN/DM-	Non-IMN/DM-		96	Non-IMN/DM+	Non-IMN/DM+
97	Non-IMN/DM-	Non-IMN/DM-		97	Non-IMN/DM+	Non-IMN/DM+
98	Non-IMN/DM-	Non-IMN/DM-		98	Non-IMN/DM+	Non-IMN/DM+
99	Non-IMN/DM-	Non-IMN/DM-		99	Non-IMN/DM+	Non-IMN/DM+
100	Non-IMN/DM-	Non-IMN/DM-		100	Non-IMN/DM+	Non-IMN/DM+
101	Non-IMN/DM-	Non-IMN/DM-		101	Non-IMN/DM+	Non-IMN/DM+
102	Non-IMN/DM-	Non-IMN/DM-		102	Non-IMN/DM+	Non-IMN/DM+
103	Non-IMN/DM-	Non-IMN/DM-		103	Non-IMN/DM+	Non-IMN/DM+
104	Non-IMN/DM-	Non-IMN/DM-		104	Non-IMN/DM+	Non-IMN/DM+
105	Non-IMN/DM-	Non-IMN/DM-		105	Non-IMN/DM+	Non-IMN/DM+
106	Non-IMN/DM-	Non-IMN/DM-		106	Non-IMN/DM+	Non-IMN/DM+
107	Non-IMN/DM-	Non-IMN/DM-		107	Non-IMN/DM+	Non-IMN/DM+
108	Non-IMN/DM-	Non-IMN/DM-		108	Non-IMN/DM+	Non-IMN/DM+
109	Non-IMN/DM-	Non-IMN/DM-		109	Non-IMN/DM+	Non-IMN/DM+
110	Non-IMN/DM-	Non-IMN/DM-		110	Non-IMN/DM+	Non-IMN/DM+
111	Non-IMN/DM-	Non-IMN/DM-		111	Non-IMN/DM+	Non-IMN/DM+
112	Non-IMN/DM-	Non-IMN/DM-		112	Non-IMN/DM+	Non-IMN/DM+
113	Non-IMN/DM-	Non-IMN/DM-		113	Non-IMN/DM+	Non-IMN/DM+
114	Non-IMN/DM-	Non-IMN/DM-		114	Non-IMN/DM+	Non-IMN/DM+
115	Non-IMN/DM-	Non-IMN/DM-		115	Non-IMN/DM+	Non-IMN/DM+
116	Non-IMN/DM-	Non-IMN/DM-		116	Non-IMN/DM+	Non-IMN/DM+
117	Non-IMN/DM-	Non-IMN/DM-		117	Non-IMN/DM+	Non-IMN/DM+
118	Non-IMN/DM-	Non-IMN/DM-		118	Non-IMN/DM+	Non-IMN/DM+
119	Non-IMN/DM-	Non-IMN/DM-		119	Non-IMN/DM+	Non-IMN/DM+
120	Non-IMN/DM-	Non-IMN/DM-		120	Non-IMN/DM+	Non-IMN/DM+
121	Non-IMN/DM-	Non-IMN/DM-		121	Non-IMN/DM+	Non-IMN/DM+
122	Non-IMN/DM-	Non-IMN/DM-		122	Non-IMN/DM+	Non-IMN/DM+
123	Non-IMN/DM-	Non-IMN/DM-		123	Non-IMN/DM+	Non-IMN/DM+
124	Non-IMN/DM-	Non-IMN/DM-		124	Non-IMN/DM+	Non-IMN/DM+
125	Non-IMN/DM-	Non-IMN/DM-		125	Non-IMN/DM+	Non-IMN/DM+
126	Non-IMN/DM-	Non-IMN/DM-		126	Non-IMN/DM+	Non-IMN/DM+
127	Non-IMN/DM-	Non-IMN/DM-		127	Non-IMN/DM+	Non-IMN/DM+
128	Non-IMN/DM-	Non-IMN/DM-		128	Non-IMN/DM+	Non-IMN/DM+
129	Non-IMN/DM-	Non-IMN/DM-		129	Non-IMN/DM+	Non-IMN/DM+
130	Non-IMN/DM-	Non-IMN/DM-		130	Non-IMN/DM+	Non-IMN/DM+
131	Non-IMN/DM-	Non-IMN/DM-		131	Non-IMN/DM+	Non-IMN/DM+
132	Non-IMN/DM-	Non-IMN/DM-		132	Non-IMN/DM+	Non-IMN/DM+
133	Non-IMN/DM-	Non-IMN/DM-		133	Non-IMN/DM+	Non-IMN/DM+
134	Non-IMN/DM-	Non-IMN/DM-		134	Non-IMN/DM+	Non-IMN/DM+
135	Non-IMN/DM-	Non-IMN/DM-
136	Non-IMN/DM-	Non-IMN/DM-
137	Non-IMN/DM-	Non-IMN/DM-
138	Non-IMN/DM-	Non-IMN/DM-
139	Non-IMN/DM-	Non-IMN/DM-
140	Non-IMN/DM-	Non-IMN/DM-
141	Non-IMN/DM-	Non-IMN/DM-
142	Non-IMN/DM-	Non-IMN/DM-
143	Non-IMN/DM-	Non-IMN/DM-
144	Non-IMN/DM-	Non-IMN/DM-
145	Non-IMN/DM-	Non-IMN/DM-
146	Non-IMN/DM-	Non-IMN/DM-
147	Non-IMN/DM-	Non-IMN/DM-
148	Non-IMN/DM-	Non-IMN/DM-
149	Non-IMN/DM-	Non-IMN/DM-
150	Non-IMN/DM-	Non-IMN/DM-
151	Non-IMN/DM-	Non-IMN/DM-
152	Non-IMN/DM-	Non-IMN/DM-
153	Non-IMN/DM-	Non-IMN/DM-
154	Non-IMN/DM-	Non-IMN/DM-
155	Non-IMN/DM-	Non-IMN/DM-
156	Non-IMN/DM-	Non-IMN/DM-
157	Non-IMN/DM-	Non-IMN/DM-
158	Non-IMN/DM-	Non-IMN/DM-
159	Non-IMN/DM-	Non-IMN/DM-
160	Non-IMN/DM-	Non-IMN/DM-
161	Non-IMN/DM-	Non-IMN/DM-
162	Non-IMN/DM-	Non-IMN/DM-
163	Non-IMN/DM-	Non-IMN/DM-
164	Non-IMN/DM-	Non-IMN/DM-
165	Non-IMN/DM-	Non-IMN/DM-
166	Non-IMN/DM-	Non-IMN/DM-
167	Non-IMN/DM-	Non-IMN/DM-
168	Non-IMN/DM-	Non-IMN/DM-
169	Non-IMN/DM-	Non-IMN/DM-
170	Non-IMN/DM-	Non-IMN/DM-
171	Non-IMN/DM-	Non-IMN/DM-
172	Non-IMN/DM-	Non-IMN/DM-
173	Non-IMN/DM-	Non-IMN/DM-
174	Non-IMN/DM-	Non-IMN/DM-
175	Non-IMN/DM-	Non-IMN/DM-
176	Non-IMN/DM-	Non-IMN/DM-
177	Non-IMN/DM-	Non-IMN/DM-
178	Non-IMN/DM-	Non-IMN/DM-
179	Non-IMN/DM-	IMN/DM-
180	Non-IMN/DM-	Non-IMN/DM-
181	Non-IMN/DM-	Non-IMN/DM-
182	Non-IMN/DM-	Non-IMN/DM-
183	Non-IMN/DM-	Non-IMN/DM-
184	Non-IMN/DM-	Non-IMN/DM-

## Sheet: Analysis 7
How many un-biopsied patients would screen positive for IMN?
Unbiopsied Diabetic Patients				Unbiopsied Non-Diabetic Patients
Sample	Prediction			Sample	Prediction
1	IMN-Neg			1	IMN-Neg
2	IMN-Neg			2	IMN-Neg
3	IMN-Neg			3	IMN
4	IMN-Neg			4	IMN-Neg
5	IMN-Neg			5	IMN-Neg
6	IMN			6	IMN-Neg
7	IMN			7	IMN-Neg
8	IMN-Neg			8	IMN-Neg
9	IMN			9	IMN-Neg
10	IMN-Neg			10	IMN-Neg
11	IMN-Neg			11	IMN-Neg
12	IMN-Neg			12	IMN-Neg
13	IMN-Neg			13	IMN-Neg
14	IMN-Neg			14	IMN-Neg
15	IMN-Neg			15	IMN-Neg
16	IMN-Neg			16	IMN-Neg
17	IMN-Neg			17	IMN-Neg
18	IMN-Neg			18	IMN-Neg
19	IMN-Neg			19	IMN-Neg
20	IMN-Neg			20	IMN-Neg
21	IMN-Neg			21	IMN-Neg
22	IMN-Neg			22	IMN-Neg
23	IMN-Neg			23	IMN-Neg
24	IMN-Neg			24	IMN-Neg
25	IMN-Neg			25	IMN-Neg
26	IMN-Neg			26	IMN-Neg
27	IMN-Neg			27	IMN-Neg
28	IMN-Neg			28	IMN-Neg
29	IMN-Neg			29	IMN-Neg
30	IMN-Neg			30	IMN-Neg
31	IMN-Neg			31	IMN-Neg
32	IMN-Neg			32	IMN-Neg
33	IMN-Neg			33	IMN-Neg
34	IMN-Neg			34	IMN-Neg
35	IMN-Neg			35	IMN-Neg
36	IMN-Neg			36	IMN-Neg
37	IMN-Neg			37	IMN-Neg
38	IMN-Neg			38	IMN-Neg
39	IMN-Neg			39	IMN-Neg
40	IMN-Neg			40	IMN-Neg
41	IMN-Neg			41	IMN-Neg
42	IMN-Neg			42	IMN-Neg
43	IMN-Neg			43	IMN-Neg
44	IMN-Neg			44	IMN-Neg
45	IMN-Neg			45	IMN-Neg
46	IMN-Neg			46	IMN-Neg
47	IMN-Neg			47	IMN-Neg
48	IMN-Neg			48	IMN-Neg
49	IMN-Neg			49	IMN-Neg
50	IMN-Neg			50	IMN-Neg
51	IMN-Neg			51	IMN-Neg
52	IMN			52	IMN-Neg
53	IMN-Neg			53	IMN-Neg
54	IMN-Neg			54	IMN-Neg
55	IMN			55	IMN-Neg
56	IMN-Neg			56	IMN-Neg
57	IMN-Neg			57	IMN-Neg
58	IMN-Neg			58	IMN-Neg
59	IMN-Neg			59	IMN-Neg
60	IMN-Neg			60	IMN-Neg
61	IMN			61	IMN-Neg
62	IMN-Neg			62	IMN-Neg
63	IMN-Neg
64	IMN-Neg
65	IMN-Neg
66	IMN-Neg
67	IMN-Neg
68	IMN-Neg
69	IMN-Neg
70	IMN-Neg
71	IMN-Neg
72	IMN-Neg
73	IMN-Neg
74	IMN-Neg
75	IMN
76	IMN-Neg
77	IMN-Neg
78	IMN-Neg
79	IMN
80	IMN-Neg
81	IMN-Neg
82	IMN
83	IMN-Neg
84	IMN-Neg
85	IMN-Neg
86	IMN-Neg
87	IMN-Neg
88	IMN
89	IMN-Neg
90	IMN-Neg
91	IMN-Neg
92	IMN-Neg
93	IMN-Neg
94	IMN
95	IMN-Neg
96	IMN-Neg
97	IMN-Neg
98	IMN-Neg
99	IMN-Neg
100	IMN-Neg
101	IMN-Neg
102	IMN-Neg
103	IMN-Neg
104	IMN-Neg
105	IMN-Neg
106	IMN-Neg
107	IMN-Neg
108	IMN-Neg
109	IMN-Neg
110	IMN-Neg
111	IMN-Neg
112	IMN-Neg
113	IMN
114	IMN-Neg
115	IMN-Neg
116	IMN-Neg
117	IMN-Neg
118	IMN
119	IMN-Neg
120	IMN
121	IMN
122	IMN-Neg
123	IMN-Neg
124	IMN-Neg
125	IMN-Neg
126	IMN-Neg
127	IMN-Neg
128	IMN-Neg
129	IMN-Neg
130	IMN-Neg
131	IMN-Neg
132	IMN-Neg
133	IMN
134	IMN-Neg
135	IMN
136	IMN-Neg
137	IMN-Neg
138	IMN-Neg
139	IMN-Neg
140	IMN-Neg
141	IMN-Neg
142	IMN-Neg
143	IMN-Neg
144	IMN-Neg
145	IMN-Neg
146	IMN
147	IMN-Neg
148	IMN-Neg
149	IMN-Neg
150	IMN-Neg
151	IMN
152	IMN-Neg
153	IMN-Neg
154	IMN-Neg
155	IMN
156	IMN-Neg

## Sheet: Analysis 8
DKD with Overlapping Pathologies
DKD/NO vs. Other				DKD/NO vs. IMN
Sample	Actual Class	Prediction		Sample	Actual Class	Prediction
1	DKD/DO	DKD/DO		1	DKD/NO'	DKD/NO'
2	DKD/DO	DKD/DO		2	DKD/NO'	DKD/NO'
3	DKD/DO	DKD/DO		3	DKD/NO'	IMN'
4	DKD/DO	DKD/DO		4	DKD/NO'	DKD/NO'
5	DKD/DO	DKD/DO		5	DKD/NO'	IMN'
6	DKD/DO	DKD/DO		6	DKD/NO'	DKD/NO'
7	DKD/DO	DKD/DO		7	DKD/NO'	DKD/NO'
8	DKD/DO	DKD/DO		8	DKD/NO'	DKD/NO'
9	DKD/DO	DKD/DO		9	DKD/NO'	DKD/NO'
10	Other	Other		10	IMN'	DKD/NO'
11	Other	Other		11	IMN'	IMN'
12	Other	Other		12	IMN'	IMN'
13	Other	Other		13	IMN'	IMN'
14	Other	Other		14	IMN'	DKD/NO'
15	Other	Other		15	IMN'	IMN'
16	Other	Other		16	IMN'	IMN'
17	Other	Other		17	IMN'	IMN'
18	Other	Other		18	IMN'	IMN'
				19	IMN'	IMN'
				20	IMN'	IMN'
